# Supplementary material for: Bisphenol A deteriorates egg quality through HDAC7 suppression
Source: PubMed Central journal article supplement (PMC5696187; doi:10.18632/oncotarget.21308), 2017-09-28
Supplement: oncotarget-08-92359-s001.pdf [file oncotarget-08-92359-s001.pdf]

## Bisphenol A deteriorates egg quality through HDAC7 suppression

### SUPPLEMENTARY MATERIALS

Supplementary Table 1: All the primers used in this study were listed

| Gene Symbol name | >Primer sequence                                                      | >Tm(°C) |                         |
|------------------|-----------------------------------------------------------------------|---------|-------------------------|
| HDAC4            | F: ATGAGCTCCCAAAGCCATC<br>R: CTACAGTGGTGGTTCCTCCTCC                   | 52      | For full length cloning |
| HDAC5            | F: ATGCTGCTGGTGCCATGCTGCT<br>R: TTACCTGGGGCTGTGCTCTTGAGTGG            | 56      |                         |
| HDAC7            | F: ATGGACCTGCGGGTGGGC<br>R: CTAGAGGTTTCATGGGTTCT                      | 58      |                         |
| HDAC9            | F: ATGAGCTCGCCGGTGCAGC<br>R: TCACAAGGCTGGCTCCTC                       | 55      |                         |
| HDAC1            | F: TGA CTCACAATTTGCTG<br>R: CTGTATTCAGACATATTATCTGGGC                 | 55      | For qPCR assay          |
| HDAC2            | F: GGATCCATGGCGTACAGTCAAGGAGGC<br>R:<br>GCGGCCGCTCAAGGGTTGCTGAGTTGTTC | 60      |                         |
| HDAC3            | F: TTATGGTCTCTATAAGAAGATGAT<br>R: AGGCTCTTGGTGAAACCCTG                | 58      |                         |
| HDAC4            | F: CAGACACCCCTTGTCACAGGCCTGG<br>R: GCCTGTGCGTTCTGCGGCAGG              | 60      |                         |
| HDAC5            | F: GGCACCCAGCAAGCATCAGCAAGCA<br>R: ATGGGCATCACTACTGTCC                | 55      |                         |
| HDAC6            | F: CTAAATGACTTCCATTGCCTTT<br>R: AGGTGGGGCCAGAAGCGACCATGTTCA           | 55      |                         |
| HDAC7            | F: GCAGTCAGTCCACTCTGAAC<br>R: GCGAGCGGATGGCACTGAGG                    | 60      |                         |
| HDAC8            | F:<br>AATGATGCTGTCCTGGGAATATTACGATTG<br>R: GGAGAACTTGTGCAGGGACACAG    | 58      |                         |
| HDAC9            | F: GTAGCAGCTCTCCAGGGTCA<br>R: GCACTTCTGTTTGTCTTTGA                    | 55      |                         |
| HDAC10           | F: CTTTGCCCATCTCACACAGCTG<br>R: GAAGGGGAGGTGTGGGGTCACC                | 58      |                         |
| GAPDH            | F: CGTCCCCTAGACAAAATGGT<br>R: TTGATGGCAACAATCTCCAC                    | 58      |                         |
| CDF9             | F: AAAGTTTCCATTGCTGCTGCTC<br>R: TCTGATGTAACGGGCTCTTGG                 | 60      | For ChIP-qPCR assay     |
| BMP15            | F: tcccttgggcttgtgtggggcct<br>R: AAGTAGGGCCTCAGCCAGAAG                | 60      |                         |
| JAG1             | F: TACTAGCGTTTTACGGGCG<br>R: TCGAACAGGAGGAGCAGAGAGCGA                 | 59      |                         |
| ATF4             | F: TCCCATCTTCGGTGTAGCG<br>R: GTAACAAAGCAGTAGAGGCATTCG                 | 59      |                         |
| CTCF             | F: GTGGGTACAGCGGCAGATA<br>R: ACGATTGGGTAGTTCCGGCATT                   | 60      |                         |
